# Supplementary material for: Complementary Feeding: Pitfalls for Health Outcomes
Source: PubMed Central journal article supplement (PMC7662522; doi:10.3390/ijerph17217931), 2020-10-29
Supplement: ijerph-17-07931-s001.pdf [file ijerph-17-07931-s001.pdf]

**TableS1:** Recommended daily intake for macro and micronutrients during the first year of life

|                                                        | Italian Recommended Dietary Allowances (RDA) |                                                     | UK British Nutrition Foundation        |                                              | EFSA (European Food Safety Authority) |                                                     | US NIH (National Institutes of Health) |                              |
|--------------------------------------------------------|----------------------------------------------|-----------------------------------------------------|----------------------------------------|----------------------------------------------|---------------------------------------|-----------------------------------------------------|----------------------------------------|------------------------------|
| Energy                                                 | 6 mo                                         | 620 kcal/d (M)<br>570 kcal/d (F)                    | 1-2 mo                                 | 574 kcal/d (M)<br>502 kcal/d (F)             | 6 mo                                  | 597 kcal/d (M) (AR)<br>549 kcal/d (F) (AR)          | -                                      | -                            |
|                                                        | 7 mo                                         | 640 kcal/d (M)<br>580 kcal/d (F)                    |                                        |                                              | 7 mo                                  | 636 kcal/d (M) (AR)<br>573 kcal/d (F) (AR)          |                                        |                              |
|                                                        | 8 mo                                         | 660 kcal/d (M)<br>600 kcal/d (F)                    | 3-4 mo                                 | 598 kcal/d (M)<br>550 kcal/d (F)             | 8 mo                                  | 661 kcal/d (M) (AR)<br>599 kcal/d (F) (AR)          |                                        |                              |
|                                                        | 9 mo                                         | 690 kcal/d (M)<br>630 kcal/d (F)                    | 5-6 mo                                 | 622 kcal/d (M)<br>574 kcal/d (M)             | 9 mo                                  | 688 kcal/d (M) (AR)<br>625 kcal/d (F) (AR)          |                                        |                              |
|                                                        | 10 mo                                        | 730 kcal/d (M)<br>640 kcal/d (F)                    | 7-12 mo                                | 718 kcal/d (M)<br>646 kcal/d (M)             | 10 mo                                 | 725 kcal/d (M) (AR)<br>656 kcal/d (F) (AR)          |                                        |                              |
|                                                        | 11 mo                                        | 740 kcal/day (M)<br>660 kcal/day (F)                |                                        |                                              | 11 mo                                 | 742 kcal/d (M) (AR)<br>673 kcal/d (F) (AR)          |                                        |                              |
|                                                        | 12 mo                                        | 790 kcal/day (M)<br>690 kcal/day (F)                |                                        |                                              | 12 mo                                 | 777 kcal/d (M) (AR)<br>712 kcal/d (F) (AR)          |                                        |                              |
| Total water                                            | 6-12 mo                                      | 0.8 L/d (AI)                                        | -                                      | -                                            | 7-11 mo                               | 0.8 L/d (AI)                                        | 0-6 mo<br>6-12 mo                      | 0.7 L/d (AI)<br>0.8 L/d (AI) |
| Carbohydrates                                          | All ages                                     | 45-60 % E                                           | -                                      | -                                            | 7-11 mo                               | NA                                                  | 0-6 mo<br>6-12 mo                      | 60 g/d (AI)<br>95 g/d (AI)   |
| Soluble sugars                                         | All ages                                     | <15% E                                              | -                                      | -                                            | -                                     | -                                                   |                                        | -                            |
| Dietary fiber                                          | -                                            | -                                                   | -                                      | -                                            | 7-11 mo                               | ND                                                  | 0-6<br>6-12 mo                         | ND                           |
| Total lipids                                           | 0-12 mo                                      | 40% E (AI)                                          | -                                      | -                                            | 7-11 mo                               | 40 % E (AI)                                         | 0-6 mo<br>6-12 mo                      | 31 g/d (AI)<br>30 g/d (AI)   |
| Alpha-linolenic acid (ALA)                             | -                                            | -                                                   | -                                      | -                                            | 7-11 mo                               | 0.5 % E (AI)                                        | 0-6 mo<br>6-12 mo                      | 0.5 g/d (AI)<br>0.5 g/d (AI) |
| Eicosapentaenoic acid, Docosahexaenoic acid (EPA, DHA) | 0-12 mo                                      | EPA-DHA 250 mg +<br>DHA 100 mg                      | -                                      | -                                            | 7-11 mo                               | 100 mg/d DHA (AI)                                   | -                                      | -                            |
| Linoleic acid (LA)                                     | -                                            | -                                                   | -                                      | -                                            | 7-11 mo                               | 4 % E                                               | 0-6 mo<br>6-12 mo                      | 4.4 g/d (AI)<br>4.6 g/d (AI) |
| Saturated fatty acids (SFA)                            | 0-12 mo                                      | <10% E                                              | -                                      | -                                            | 7-11 mo                               | ALAP (AI)                                           | -                                      | -                            |
| Trans-fatty acids (TFA)                                | 0-12 mo                                      | ALAP                                                | -                                      | -                                            | 7-11 mo                               | ALAP (AI)                                           | -                                      | -                            |
| Proteins                                               | 6-12 mo                                      | 1.11 g/kg bw per d (AR)<br>1.32 g/kg bw per d (PRI) | 0-3 mo<br>4-6 mo<br>7-9 mo<br>10-12 mo | 12.5 g/d<br>12.7 g/d<br>13.7 g/d<br>14.9 g/d | 7-11 mo                               | 1.12 g/kg bw per d (AR)<br>1.31 g/kg bw per d (PRI) | 0-6 mo<br>6-12 mo                      | 9.1 g/d (AI)<br>11 g/d (RDA) |
| <b>Minerals</b>                                        |                                              |                                                     |                                        |                                              |                                       |                                                     |                                        |                              |

|                         |           |               |                                        |                                                                  |         |                                           |                   |                                 |
|-------------------------|-----------|---------------|----------------------------------------|------------------------------------------------------------------|---------|-------------------------------------------|-------------------|---------------------------------|
| Calcium                 | 6-12 mo   | 260 mg/d (AI) | 0-3 mo<br>4-6 mo<br>7-9 mo<br>10-12 mo | 525 mg/d<br>525 mg/d<br>525 mg/d<br>525 mg/d                     | 7-11 mo | 280 mg/d (AI)                             | 0-6 mo<br>7-12 mo | 200 mg/d (AI)<br>260 mg/d (AI)  |
| Iron                    | 6 - 12 mo | 11 mg/d (PRI) | 0-3 mo<br>4-6 mo<br>7-9 mo<br>10-12 mo | 1.7 mg/d<br>4.3 mg/d<br>7.8 mg/d<br>7.8 mg/d                     | 7-11 mo | 8 mg/d (AR)<br>11 mg/d (PRI)              | 0-6 mo<br>7-12 mo | 0.27 mg/d (AI)<br>11 mg/d (RDA) |
| Sodium                  | 6 - 12 mo | 0.4 g/d (AI)  | 0-3 mo<br>4-6 mo<br>7-9 mo<br>10-12 mo | 210 mg/d<br>280 mg/d<br>320 mg/d<br>350 mg/d                     | 7-11 mo | 0.2 g/d (AI)                              | 0-6 mo<br>7-12 mo | 110 mg/d (AI)<br>370 mg/d (AI)  |
| Zinc                    | 6 - 12 mo | 3 mg/d (AI)   | 0-3 mo<br>4-6 mo<br>7-9 mo<br>10-12 mo | 4 mg/d<br>4 mg/d<br>5 mg/d<br>5 mg/d                             | 7-11 mo | 2.4 mg/d (AR)<br>2.9 mg/d (PRI)           | 0-6 mo<br>7-12 mo | 2 mg/d (AI)<br>3 mg/d (RDA)     |
| <b>Vitamins</b>         |           |               |                                        |                                                                  |         |                                           |                   |                                 |
| Cobalamin (vitamin B12) | 6 - 12 mo | 0.7 µg/d (AI) | 0-3 mo<br>4-6 mo<br>7-9 mo<br>10-12 mo | 0.3 µg/d<br>0.3 µg/d<br>0.4 µg/d<br>0.4 µg/d                     | 7-11 mo | 1.5 µg/d (AI)                             | 0-6 mo<br>6-12 mo | 0.4 µg/d (AI)<br>0.5 µg/d (AI)  |
| Folate                  | 6 - 12 mo | 110 µg/d (AI) | 0-3 mo<br>4-6 mo<br>7-9 mo<br>10-12 mo | 50 µg/d<br>50 µg/d<br>50 µg/d<br>50 µg/d                         | 7-11 mo | 80 µg DFE/d (AI)                          | 0-6 mo<br>6-12 mo | 65 µg/d (AI)<br>80 µg/d (AI)    |
| Vitamin A               | 6 - 12 mo | 450 µg/d (AI) | 0-3 mo<br>4-6 mo<br>7-9 mo<br>10-12 mo | 350 µg/d<br>350 µg/d<br>350 µg/d<br>350 µg/d                     | 7-11 mo | 190 µg/d RE/d (AR)<br>250 µg/d RE/d (PRI) | 0-6 mo<br>6-12 mo | 400 µg/d (AI)<br>500 µg/d (AI)  |
| Vitamin D               | 6-12 mo   | 10 µg/d (AI)  | 0-3 mo<br>4-6 mo<br>7-9 mo<br>10-12 mo | 8.5 - 10 µg/d<br>8.5 - 10 µg/d<br>8.5 - 10 µg/d<br>8.5 - 10 µg/d | 7-11 mo | 10 µg/d (AI)                              | 0-6 mo<br>6-12 mo | 10 µg/d (AI)<br>10 µg/d (AI)    |

Legend:

ND not determined

NA not available

AI adequate intakes

AR average requirement

RDA recommended dietary allowances

ALAP as low as possible

DFE dietary folate equivalents

NE niacin equivalent

RE retinol equivalent

- not specified
